# Supplementary material
Source: HighWire-hosted journal article supplement (doi:10.1101/rna.074377.119)
Supplement: Supplemental_Material.pdf [file Supplemental_Material.pdf]

Supplemental Material

**Substrate analogs that trap the 2'-phospho-ADP-ribosylated RNA intermediate of the Tpt1 (tRNA 2'-phosphotransferase) reaction pathway**

Swathi Dantuluri, Leonora Abdullahu, Annum Munir, Adam Katolik, Masad J. Damha, and Stewart Shuman

Supplemental Figures S1, S2, S3, S4

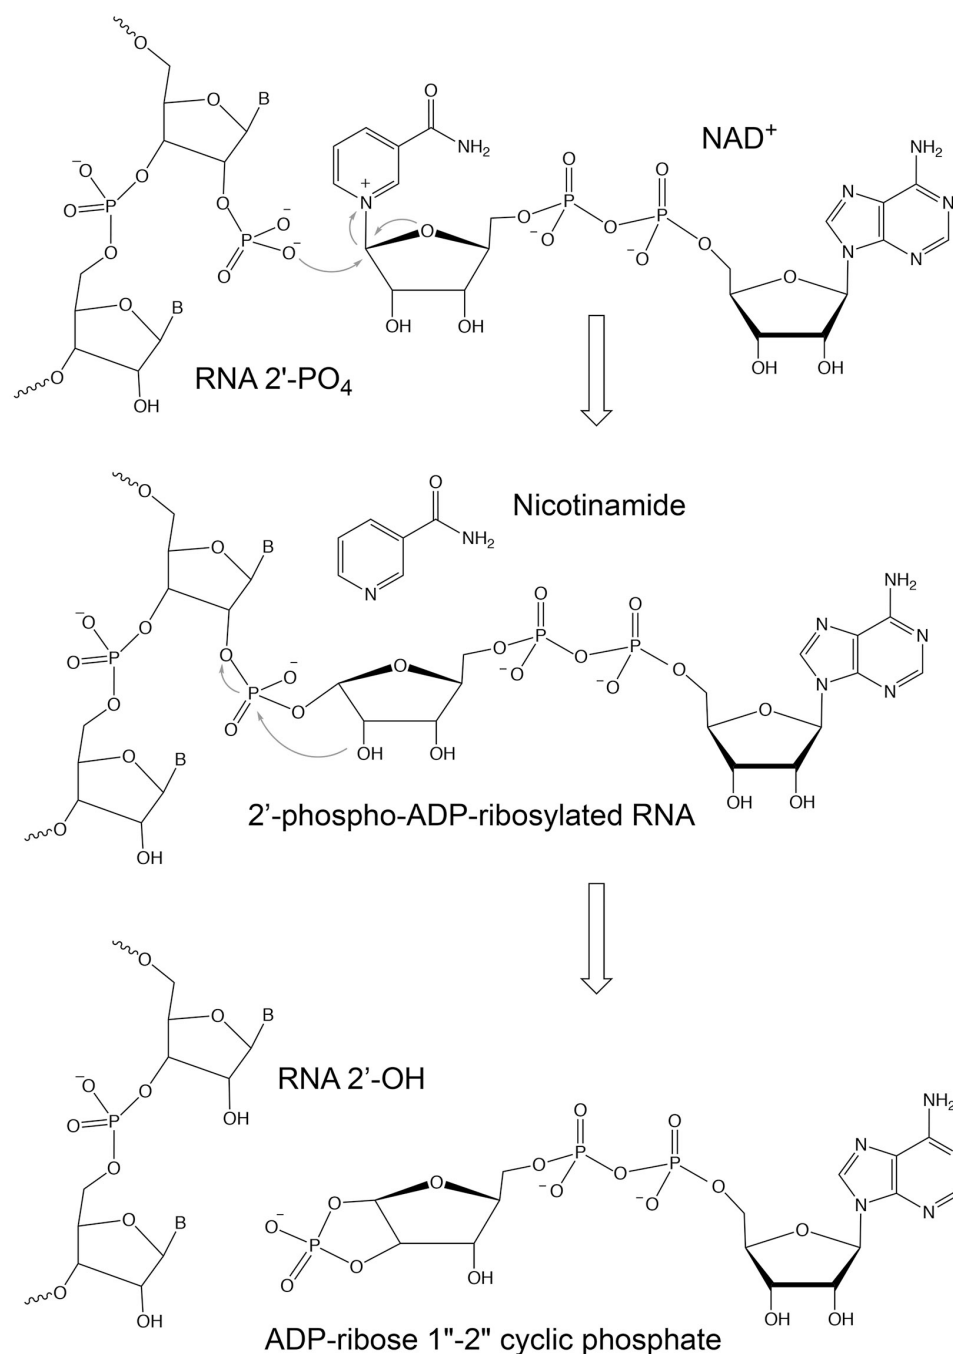

Figure S1. **Two-step Tpt1-catalyzed mechanism of 2'- $\text{PO}_4$  removal from a 2'- $\text{PO}_4$ , 3'-5' phosphodiester RNA junction.** The Tpt1 reaction pathway comprises the two chemical steps shown in which: (1) the RNA 2'- $\text{PO}_4$  reacts with  $\text{NAD}^+$  to expel nicotinamide and form a 2'-phospho-ADP-ribosylated RNA intermediate; and (2) transesterification of the ADP-ribose 2''-OH to the RNA 2'- $\text{PO}_4$  displaces the RNA 2'-OH and generates ADP-ribose-1'',2''-cyclic phosphate.

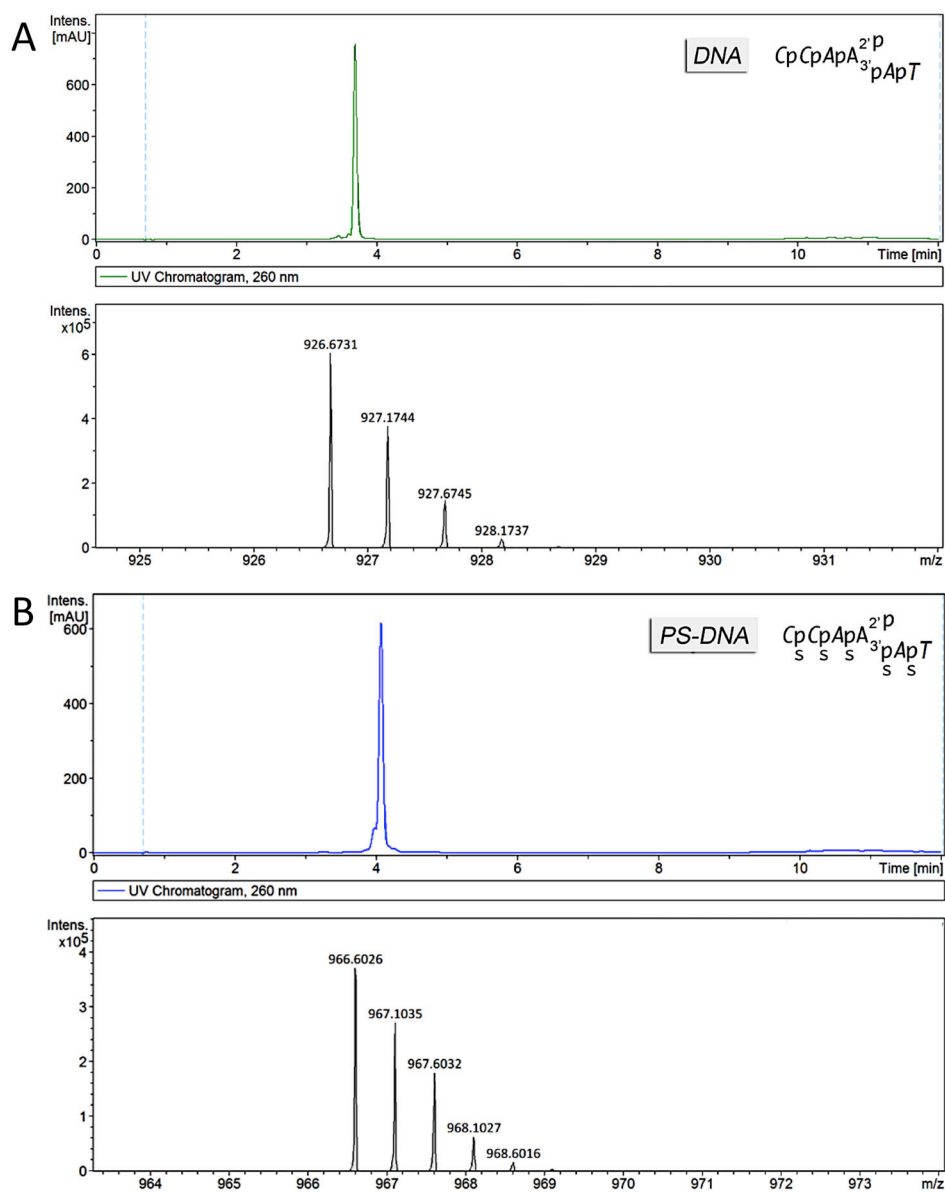

Figure S2. LC-MS (-ve mode) chromatograms of 2'-PO<sub>4</sub> DNA and PS-DNA oligonucleotides.

(A) DNA – mass calculated: 1854.31; mass observed: 1853.35.

(B) PS-DNA – mass calculated: 1934.32, mass observed: 1933.21.

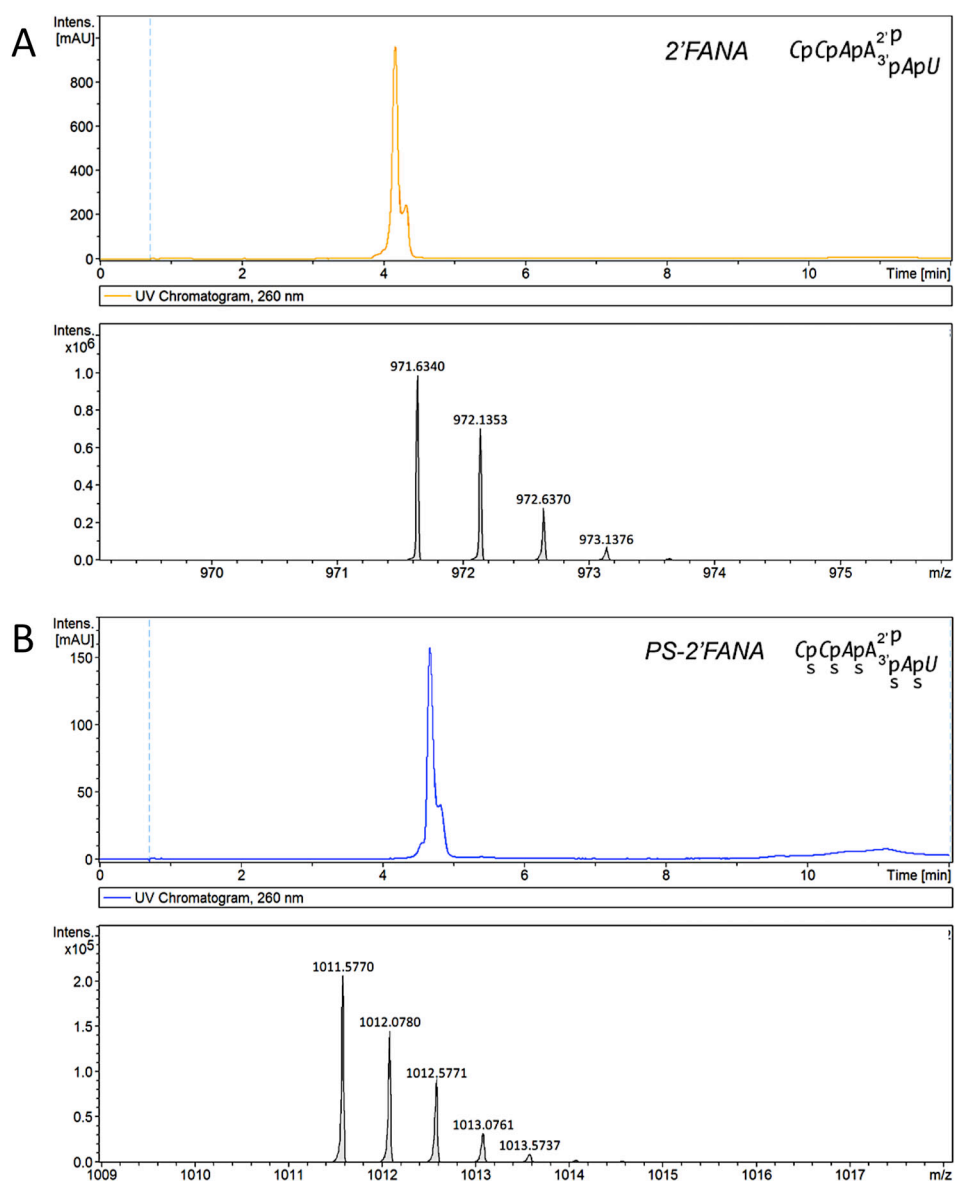

Figure S3. LC-MS (-ve mode) chromatograms of 2'-FANA and PS-2'-FANA oligonucleotides.

(A) 2'-FANA – mass calculated: 1942.26, mass observed: 1943.27.

(B) PS-2'-FANA – mass calculated: 2021.25, mass observed: 2023.15.

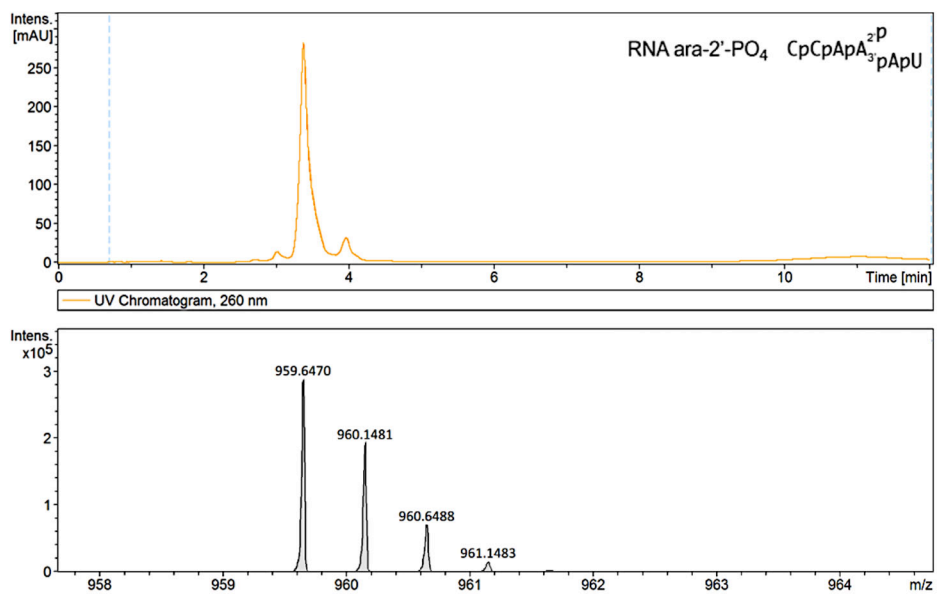

Figure S4. **LC-MS (-ve mode) chromatogram of ara-2'-PO<sub>4</sub> RNA oligonucleotide.**

Mass calculated: 1919.28, mass observed: 1919.29.
